# Automated Detection of Keratorefractive Laser Surgeries on Optical Coherence Tomography using Deep Learning

**Running Head:** AI on OCT for Keratorefractive Surgery Detection

**Jad F. Assaf, MD** <sup>1,2\*</sup>, **Hady Yazbeck, MD** <sup>2\*</sup>, **Dan Z. Reinstein, MD MA(Cantab) FRCOphth** <sup>3,4,5,6,7</sup>, **Timothy Archer, MA(Oxon) DipCompSci(Cantab) PhD** <sup>3,4</sup>, **Roland Assaf, MD** <sup>2</sup>, **Diego de Ortueta, MD** <sup>8</sup>, **Juan Arbelaez, MD** <sup>9</sup>, **Maria Clara Arbelaez, MD** <sup>9</sup>, **Shady T. Awwad, MD** <sup>10</sup>

- 1 Casey Eye Institute, Oregon Health & Science University, Portland, OR, USA
- 2 Faculty of Medicine, American University of Beirut, Beirut, Lebanon
- 3 Reinstein Vision, London UK
- 4 London Vision Clinic, London UK
- 5 Columbia University Medical Center, New York, NY, USA
- 6 Sorbonne Université, Paris, France
- 7 Biomedical Science Research Institute, Ulster University, Coleraine, UK
- 8 Aurelios Augenzentrum Recklinghausen, Erlbruch 34-36, 45657 Recklinghausen, Germany
- 9 Muscat Eye Laser Center, Muscat, Oman
- 10 Department of Ophthalmology, American University of Beirut Medical Center, Beirut, Lebanon

*\* Drs Jad F. Assaf and Hady Yazbeck contributed equally to this work.*

**Corresponding author:** Shady T. Awwad, MD

Email: [sawwad@gmail.com](mailto:sawwad@gmail.com)

Phone: +961 3 722 498

Address: Department of Ophthalmology, American University of Beirut Medical Center Clinics, Beirut, Lebanon

**NOTE:** This preprint reports new research that has not been certified by peer review and should not be used to guide clinical practice.

**Financial interest:** Dr Reinstein is a consultant for Carl Zeiss Meditec (Carl Zeiss Meditec AG, Jena, Germany). Dr Reinstein is also a consultant for CSO Italia (Florence, Italy) and has a proprietary interest in the Artemis technology (ArcScan Inc, Golden, Colorado) through patents administered by the Cornell Center for Technology Enterprise and Commercialization (CCTEC), Ithaca, New York. Dr Awwad is a consultant for Carl Zeiss Meditec (Carl Zeiss Meditec AG, Jena, Germany). Drs Assaf and Awwad have financial interest in NeuralVision – FZCO (Dubai, UAE). In addition to the previously disclosed interests, a full patent has been filed by Drs Assaf, Awwad, and Yazbeck pertaining to the methodologies and technologies discussed in this study. The remaining authors have no proprietary or financial interest in the materials presented herein.

**Funding:** This research was partially funded by the Suhail Muasher Endowed Medical Student Research Award.

**Keywords:** Optical Coherence Tomography; Anterior Segment Optical Coherence Tomography; Artificial Intelligence; Deep Learning; Machine Learning; Laser; Laser-Assisted In Situ Keratomileusis; Photorefractive Keratectomy; Keratorefractive Lenticule Extraction; Small Incision Lenticule Extraction; Corneal Lenticule Extraction For Advanced Refractive Correction;

**Acronyms:**

- OCT: Optical Coherence Tomography
- AS-OCT: Anterior Segment Optical Coherence Tomography
- LASIK: Laser-Assisted In Situ Keratomileusis
- Femto-LASIK: Femtosecond Laser-Assisted In Situ Keratomileusis
- PRK: Photorefractive Keratectomy
- KLEx: Keratorefractive Lenticule Extraction
- CLEAR: Corneal Lenticule Extraction for Advanced Refractive Correction
- SMILE: Small Incision Lenticule Extraction
- IOL: Intraocular Lens
- AI: Artificial Intelligence
- AUBMC: American University of Beirut Medical Center
- IRB: Institutional Review Board
- SE: Spherical Equivalent
- CNN: Convolutional Neural Network

- ROC: Receiver Operating Characteristic
- PR: Precision-Recall
- AUC: Area Under the Curve

### **CRedit Author Statement**

- Jad F. Assaf: Investigation, Methodology, Software, Writing - Original Draft, Funding acquisition, Project administration.
- Hady Yazbeck: Investigation, Visualization, Data Curation, Writing - Original Draft.
- Dan Z. Reinstein: Resources, Writing - Review & Editing.
- Timothy Archer: Resources, Writing - Original Draft.
- Roland Assaf: Data Curation, Writing - Review & Editing.
- Diego de Ortueta: Resources, Writing - Review & Editing.
- Juan Arbelaez: Resources, Writing - Review & Editing.
- Maria Clara Arbelaez: Resources, Writing - Review & Editing.
- Shady T. Awwad: Conceptualization, Supervision, Writing - Review & Editing.

## ABSTRACT

**PURPOSE:** To report a deep learning neural network on anterior segment optical coherence tomography (AS-OCT) for automated detection of different keratorefractive laser surgeries—including Laser In-Situ Keratomileusis with femtosecond microkeratome (Femto-LASIK), LASIK with mechanical microkeratome, photorefractive keratectomy (PRK), keratorefractive lenticule extraction (KLEx), and non-operated eyes—while also distinguishing the targeted ametropias, such as myopic and hyperopic treatments, within these procedures.

**DESIGN:** Cross-sectional retrospective study.

**METHODS:** A total of 14,948 eye scans from 2,278 eyes of 1,166 subjects were used to develop a deep learning neural network algorithm with an 80/10/10 patient distribution for training, validation, and testing phases, respectively. The algorithm was evaluated for its accuracy, F1-scores, area under precision-recall curve (AUPRC), and area under receiver operating characteristic curve (AUROC).

**RESULTS:** On the test dataset, the neural network was able to detect the different surgical classes with an accuracy of 96%, a weighted-average F1-score of 96% and a macro-average F1-score of 96%. The neural network was further able to detect hyperopic and myopic subclasses within each surgical class, with an accuracy of 90%, weighted-average F1 score of 90%, and macro-average F1-score of 83%.

**CONCLUSIONS:** Determining a patient's keratorefractive laser history is vital for customizing treatments, performing precise intraocular lens (IOL) calculations, and enhancing ectasia risk

assessments, especially when electronic health records are incomplete or unavailable. Neural networks can be used to accurately classify keratorefractive laser history from AS-OCT scans, a step in transforming the AS-OCT from a diagnostic to a screening tool in the refractive clinic.

## 1 INTRODUCTION

2 Optical coherence tomography (OCT), a noncontact imaging technique, has revolutionized  
3 the visualization of biological tissues in vivo (1). Its ability to generate detailed cross-sectional  
4 images with quasi-histological resolution has been pivotal in the noninvasive clinical  
5 assessment of ocular structures, notably the cornea and anterior eye segment (2). The  
6 evolution of OCT, specifically anterior segment OCT (AS-OCT), aligns closely with the growing  
7 prevalence of corneal refractive surgeries. AS-OCT has emerged as a crucial tool in clinical  
8 practice, offering unparalleled accuracy in pre-operative diagnostics, surgical planning, and  
9 enhanced intra-operative imaging. It also plays a significant role in the post-operative  
10 evaluation and disease management (2), exemplified by its capacity to visualize the laser-  
11 assisted in situ keratomileusis (LASIK) flap during the early postoperative period (1).

12  
13 In parallel, the field of artificial intelligence (AI), particularly deep learning, has seen a  
14 remarkable integration into AS-OCT applications. This integration marks a notable departure  
15 from the traditional focus on retinal OCT, expanding the scope of AI in ocular diagnostics.  
16 These advancements have proven effective in a range of clinical applications, from automated  
17 measurements such as ICL vault estimation (3,4), to sophisticated disease detection (5–7),  
18 and even in the creation of synthetic yet realistic corneal OCT images using deep learning (8).

19  
20 A crucial aspect of clinical ophthalmology involves the accurate determination of a patient's  
21 surgical history, particularly in refractive surgery. This information is essential not only for  
22 tailoring subsequent treatments but also for precise intraocular lens (IOL) calculations in  
23 cataract surgery and informing ectasia risk assessment algorithms (9,10).

24 The identification of a patient’s keratorefractive laser surgical history becomes paramount in  
25 cases where electronic health records are unavailable or incomplete. OCT B-scans provide a  
26 wealth of information in this regard. For instance, in LASIK patients, the presence of a flap in  
27 the anterior cornea, with distinct characteristics based on the cutting technique—  
28 femtosecond or microkeratome—can be identified. Mechanical keratomes usually produce  
29 meniscal flaps with deeper peripheral penetration and a more variable flap thickness (11,12),  
30 whereas femtosecond keratomes create flaps with uniform square peripheral edges with  
31 consistent and more predictable thickness across the cornea (13–16). In contrast,  
32 keratorefractive lenticule extraction (KLEx) surgeries exhibit a cap interface, without  
33 peripheral corneal surface penetration except at the small side-cut incision, differing from the  
34 LASIK hinge (17). In parallel, photorefractive keratectomy (PRK) and Phototherapeutic  
35 Keratectomy (PTK) treatments are characterized by the absence of Bowman’s layer, without  
36 any flap or interface (18).

37

38 This manuscript introduces a deep-learning neural network tailored for AS-OCT, devised for  
39 the automated detection and classification of various keratorefractive laser surgeries. The  
40 aim was for the network to categorize OCT B-scans into broad surgical classes, including non-  
41 operated eyes, femto-LASIK, mechanical LASIK, PRK/PTK, and KLEx, and to further  
42 discriminate between myopic and hyperopic corrections within each surgery class.

43

## 44 **METHODS**

### 45 **Study Design and Ethical Compliance**

46 This retrospective study analyzed anonymized OCT data from four international centers: the  
47 American University of Beirut (AUBMC), Lebanon; London Vision Clinic, United Kingdom;

48 Muscat Laser Eye Center, Oman; and Aurelios Augenzentrum, Germany. Ethical approval was  
49 granted by the Institutional Review Board at AUBMC (IRB ID: BIO-2022-0038). Exemption from  
50 IRB was granted at the London Vision Clinic and Aurelios Augenzentrum. At Muscat Eye Laser  
51 Center, informed consent was obtained, as per routine, for using anonymized clinical data for  
52 research. Our study conforms to the principles of the Declaration of Helsinki and written  
53 informed consent was obtained from all patients prior to any procedure.

#### 54 **Patient Selection and Data Preparation**

55 The study encompassed preoperative and postoperative AS-OCT scan data from patients who  
56 underwent various types of keratorefractive laser surgeries. Eligibility for inclusion required  
57 that AS-OCT scans be conducted utilizing the MS-39 platform (CSO, Florence, Italy) and that  
58 participants had undergone one of the following keratorefractive surgeries: Femto-LASIK,  
59 LASIK with mechanical microkeratome, PRK/PTK, or KLEx, as well as those classified as non-  
60 operated eyes for normal control. KLEx surgeries included corneal lenticule extraction for  
61 advanced refractive correction (CLEAR, Ziemer) and small-incision lenticule extraction (SMILE,  
62 Carl Zeiss Meditec AG). Additionally, the type of ablation (myopic or hyperopic) was  
63 determined by the spherical equivalent correction (SE) value. Exclusion criteria included  
64 patients with multiple laser surgeries in the same eye, significant image artifacts, or minor  
65 refractive corrections (SE less than 1 diopter) since their changes on OCT might be too subtle  
66 to detect.

#### 67 **Data Allocation and Preprocessing**

68 Data were allocated to training, validation, or testing sets, ensuring no patient overlap across  
69 sets to prevent data leakage (19). The division ratio of patients was 80% training, 10%  
70 validation, and 10% testing. Radial B-scan images from varying angles were collected.  
71 Minority classes were oversampled for balanced representation. Image preprocessing



72 included cropping to a 10mm corneal section, resizing to 512 x 512 pixels, and normalization  
73 using the training dataset's color channel statistics. Data augmentation involved random  
74 alterations in rotation, contrast, and brightness.

### 75 **Deep Learning Model Architecture and Training**

76 A convolutional neural network utilizing the ResNet18 architecture was employed (20). The  
77 model was pre-trained on ImageNet, a comprehensive image database, to facilitate high-level  
78 image feature detection (21). Transfer learning from a pre-trained model expedites training  
79 and reduces data requirements. The ResNet18 convoluted neural network (CNN) connected  
80 to a 512-neuron dense layer with 40% dropout regularization and an 8-neuron output layer,  
81 correlating to the various surgical classes. The model had 11, 710, 024 trainable parameters.  
82 Training involved 100 epochs, weighted cross-entropy loss, AdamW optimization, and a batch  
83 size of 32. Patient class ratios weighted the loss function.

### 84 **Optimization and Implementation**

85 Optimal learning rates were determined through a range test (22), with discriminative fine-  
86 tuning applied to the ResNet18 layers (23). The '1cycle' learning rate scheduler was used for  
87 efficiency (24). The model was implemented in Python using PyTorch (version 1.13.1+cu117)  
88 (25) and parallelized on 2 RTX 3080 GPUs (NVIDIA, USA), donated by Hugging Face (New York,  
89 USA).

### 90 **Evaluation and Statistical Analysis**

91 The model's performance was evaluated against the validation set after each epoch to  
92 monitor for overfitting. The model at the iteration with minimal validation loss was further  
93 assessed on the independent test set.

94 Comprehensive statistical evaluations were facilitated by the TorchMetrics package (version  
95 0.9.3), incorporating a suite of metrics. Among these, receiver operating characteristic (ROC)

96 curves plot the true positive rate against the false positive rate at varied threshold settings,  
97 elucidating the model's discriminative capacity between classes. Precision-recall (PR) curves,  
98 mapping the precision (the ratio of true positive results to all positive predictions) against  
99 recall (the ratio of true positive results found in all relevant instances), are particularly  
100 insightful for models trained on imbalanced datasets.

101 The F1 score, harmonizing precision and recall, was computed in two variations: macro and  
102 weighted. The macro F1 score averages the F1 scores of each class, treating all classes equally  
103 regardless of their sample size. Conversely, the weighted F1 score accounts for class  
104 imbalance by weighting each class's F1 score by its presence in the dataset, offering a measure  
105 that reflects the model's performance across the unevenly distributed classes.

106 Further, we calculated both macro and weighted one-vs-one AUC scores to evaluate the  
107 model's performance. The macro-AUC score averages the area under the ROC curve for each  
108 class, disregarding class imbalance, thus providing a generalized metric of the model's ability  
109 to classify each class against the rest. The weighted one-vs-one AUC score, on the other hand,  
110 computes the AUC for each pairwise class comparison, weighting the contribution of each  
111 class pair by the prevalence of the respective classes in the dataset. This nuanced metric offers  
112 insight into the model's classification prowess, particularly in distinguishing between similar  
113 classes in an imbalanced dataset.

114 Additional metrics, such as overall accuracy and confusion matrices, rounded out the  
115 evaluation, providing a multidimensional view of the model's predictive performance.

### 116 **Model Output Contextualization**

117 In our analysis, we initially developed an 8-class model to meticulously classify  
118 keratorefractive surgeries by both procedure type and the ametropia addressed. The  
119 categories delineated were pre-operative, myopic Femto-LASIK, hyperopic Femto-LASIK,

120 myopic mechanical LASIK, hyperopic mechanical LASIK, myopic PRK or PTK, hyperopic PRK or  
121 PTK, and KLEx. This detailed classification scheme allowed for a nuanced understanding of the  
122 model's ability to distinguish among a broad spectrum of keratorefractive surgeries.

123 Subsequently, to streamline the model's utility for broader applications, we condensed the 8-  
124 class model into a 5-class variant. This consolidation was achieved by merging categories  
125 based on the type of procedure while disregarding the specific ametropia treated. Hence,  
126 myopic and hyperopic Femto-LASIK were combined into a single Femto-LASIK category,  
127 similarly for mechanical LASIK, and PRK/PTK categories, leading to a simplified classification  
128 comprising pre-operative, Femto-LASIK, mechanical LASIK, PRK/PTK, and KLEx. This approach  
129 underscores that the model's robustness in the detailed 8-class variant directly substantiates  
130 its validity for the more generalized 5-class model.

131 Given that the model's decision-making process is based on individual B-scan images and  
132 considering that multiple radial B-scans are available per patient, a majority selection  
133 algorithm was incorporated for eye-level classification. This entails aggregating individual B-  
134 scan predictions in a voting mechanism to determine the predominant classification for each  
135 eye.

136

## 137 **RESULTS**

138 A total of 14,948 OCT B-scans from 2,278 eyes of 1,166 patients were used for the analysis.  
139 Table 1 provides the number of B-scans, patients, and eyes for each of the surgical classes.  
140 The training set consisted of 12,109 OCT B-scans from 1812 eyes of 930 patients. The  
141 validation set consisted of 1452 scans of 233 eyes of 118 patients. Training was performed  
142 with a starting learning rate of  $10^{-3}$  and for a total of 40 minutes. The model with the lowest

143 validation loss was selected and tested using the testing set of 1387 eye-scans from 233 eyes  
144 of 118 patients.  
145

| Class                        | Patients    | Eyes        | Images       |
|------------------------------|-------------|-------------|--------------|
| Preop                        | 410         | 807         | 3174         |
| Femto-LASIK – Myopic         | 170         | 329         | 1172         |
| Femto-LASIK – Hyperopic      | 90          | 173         | 1256         |
| Mechanical LASIK – Myopic    | 137         | 272         | 3551         |
| Mechanical LASIK – Hyperopic | 43          | 85          | 1150         |
| PRK/PTK – Myopic             | 147         | 285         | 1422         |
| PRK/PTK – Hyperopic          | 59          | 111         | 2433         |
| KLEx                         | 110         | 216         | 790          |
| <b>Total</b>                 | <b>1166</b> | <b>2278</b> | <b>14948</b> |

146 **Table 1:** Database patient distribution across the different surgical classes and ametropia  
147 treated.

148

149 For the analysis of the testing set, the 5-way prediction model for surgical classes achieved an  
150 accuracy of 96%, a macro F1 average of 96% and a weighted F1 average of 96% (Fig. 1A and  
151 Table 2A). The 8-way prediction model for surgical classes and ametropia treated achieved an  
152 accuracy of 90%, a macro F1 average of 83%, a weighted F1 average of 90% (Fig. 1B and Table  
153 2B). ROC curves and PR curves for the 8-way prediction model are shown in figures 2A and  
154 2B, respectively. The one-vs-one ROC AUC scores were 97.18% (macro) and 97.89%  
155 (weighted), and one-vs-rest ROC AUC scores were 97.64% (macro) and 98.63% (weighted).

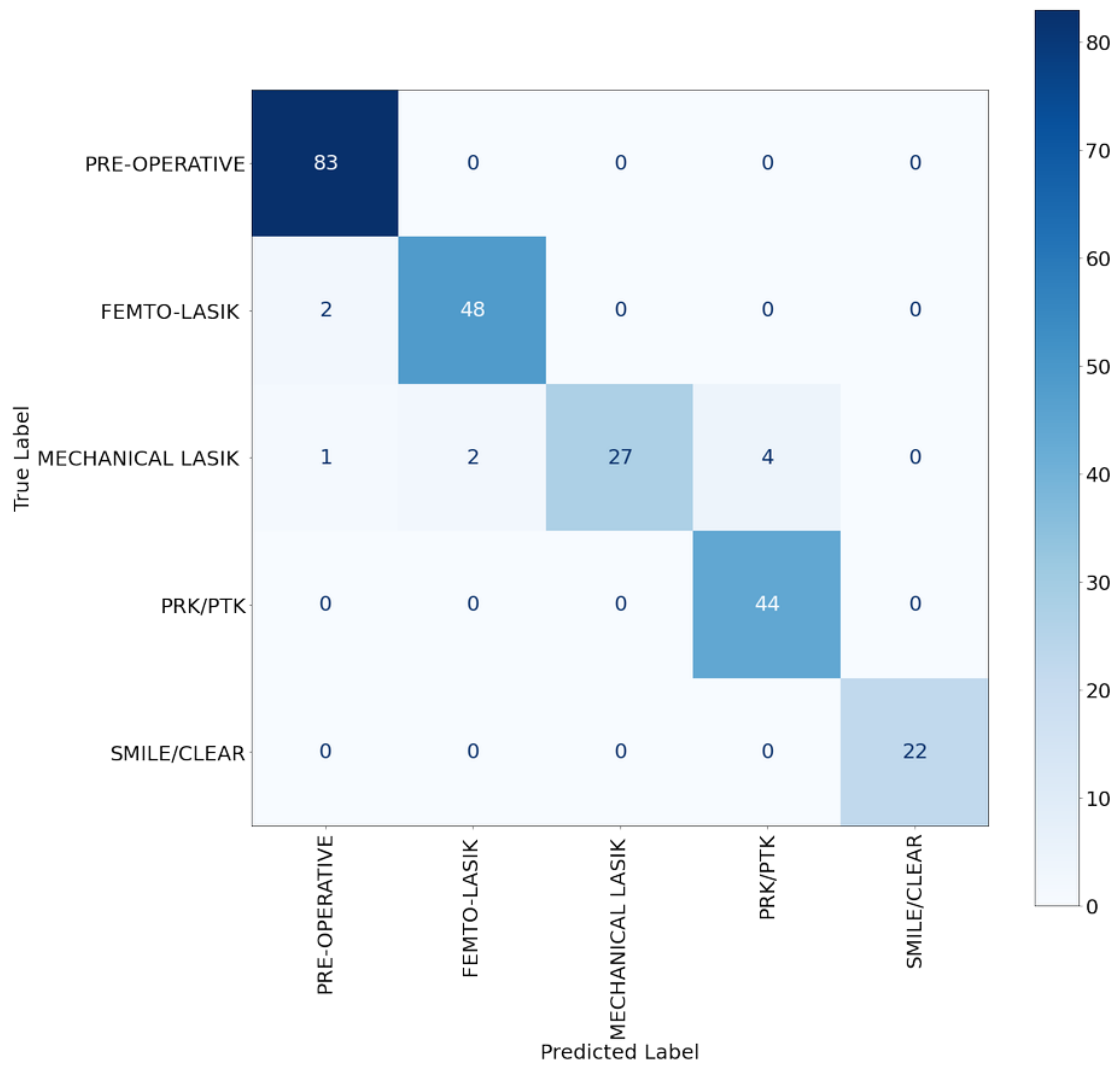

156

157 **Figure 1A:** 5-way classification confusion matrix on the test set.

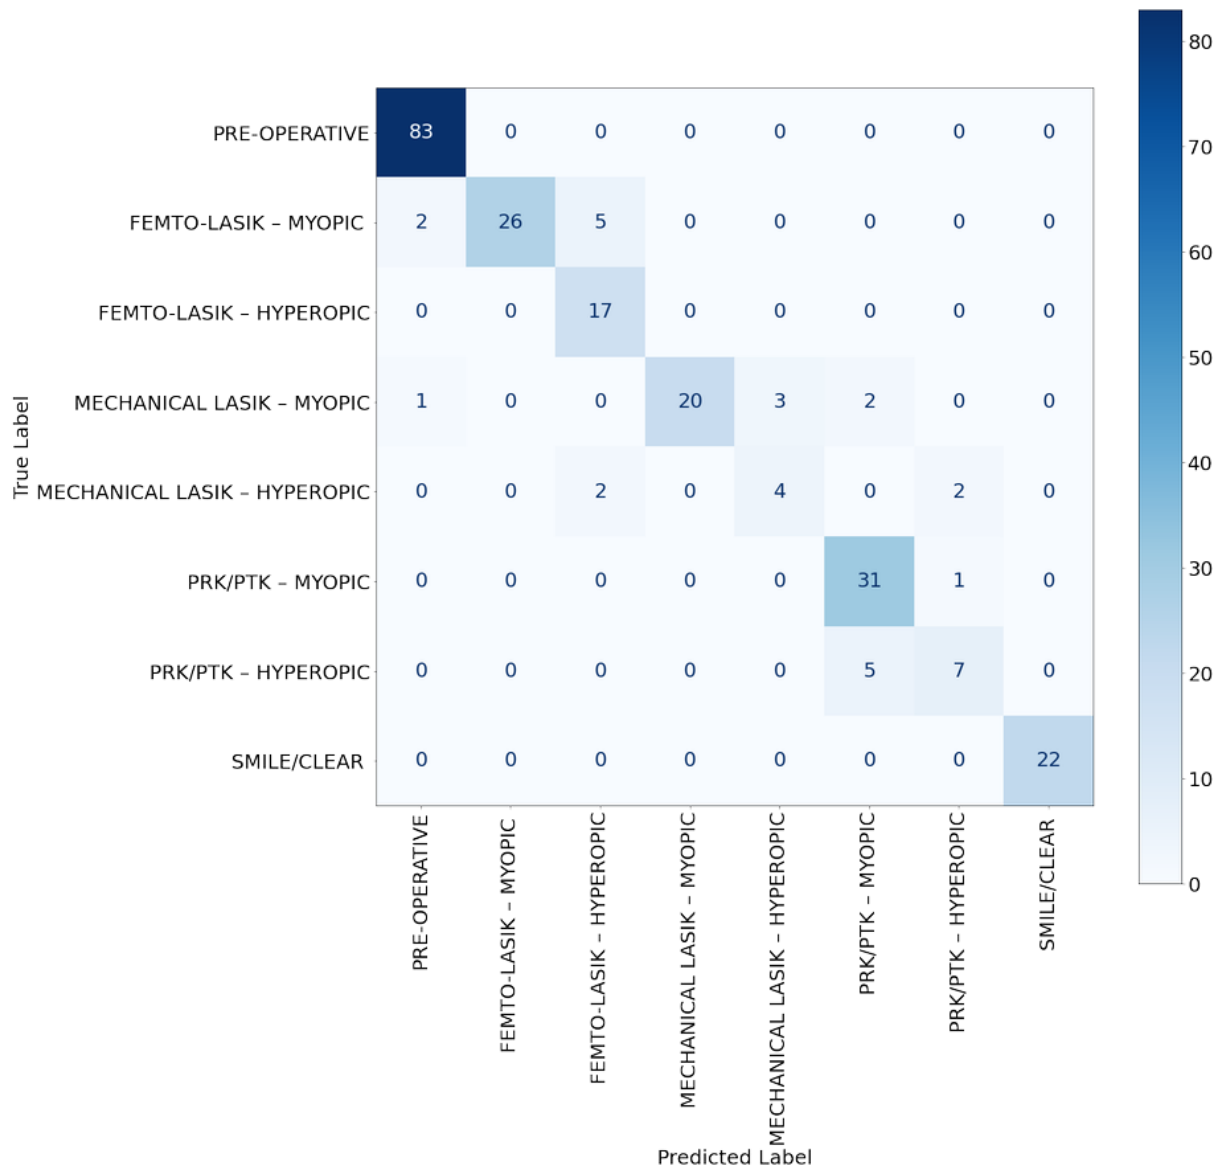

158

159 **Figure 1B:** 8-way classification confusion matrix on the test set.

160

|                         | PRECISION | RECALL | F1-SCORE | NUMBER OF EYES |
|-------------------------|-----------|--------|----------|----------------|
| <b>PRE-OPERATIVE</b>    | 0.97      | 1.00   | 0.98     | 83             |
| <b>FEMTO-LASIK</b>      | 0.96      | 0.96   | 0.96     | 50             |
| <b>MECHANICAL LASIK</b> | 1.00      | 0.79   | 0.89     | 34             |
| <b>PRK/PTK</b>          | 0.92      | 1.00   | 0.96     | 44             |
| <b>KLEx</b>             | 1.00      | 1.00   | 1.00     | 22             |

|              |      |      |      |     |
|--------------|------|------|------|-----|
|              |      |      |      |     |
| ACCURACY     |      |      | 0.96 | 233 |
| MACRO AVG    | 0.97 | 0.95 | 0.96 |     |
| WEIGHTED AVG | 0.96 | 0.96 | 0.96 |     |

161 **Table 2A:** 5-way classification results on the test set.

|                              | PRECISION | RECALL | F1-SCORE | NUMBER OF EYES |
|------------------------------|-----------|--------|----------|----------------|
| PRE-OPERATIVE                | 0.97      | 1.00   | 0.98     | 83             |
| FEMTO-LASIK – MYOPIC         | 1.00      | 0.79   | 0.88     | 33             |
| FEMTO-LASIK – HYPEROPIC      | 0.71      | 1.00   | 0.83     | 17             |
| MECHANICAL LASIK – MYOPIC    | 1.00      | 0.77   | 0.87     | 26             |
| MECHANICAL LASIK – HYPEROPIC | 0.57      | 0.50   | 0.53     | 8              |
| PRK/PTK – MYOPIC             | 0.82      | 0.97   | 0.89     | 32             |
| PRK/PTK – HYPEROPIC          | 0.70      | 0.58   | 0.64     | 12             |
| KLEx                         | 1.00      | 1.00   | 1.00     | 22             |
|                              |           |        |          |                |
| ACCURACY                     |           |        | 0.90     | 233            |
| MACRO AVG                    | 0.85      | 0.83   | 0.83     |                |
| WEIGHTED AVG                 | 0.91      | 0.90   | 0.90     |                |

162 **Table 2B:** 8-way classification results on the test set.

163

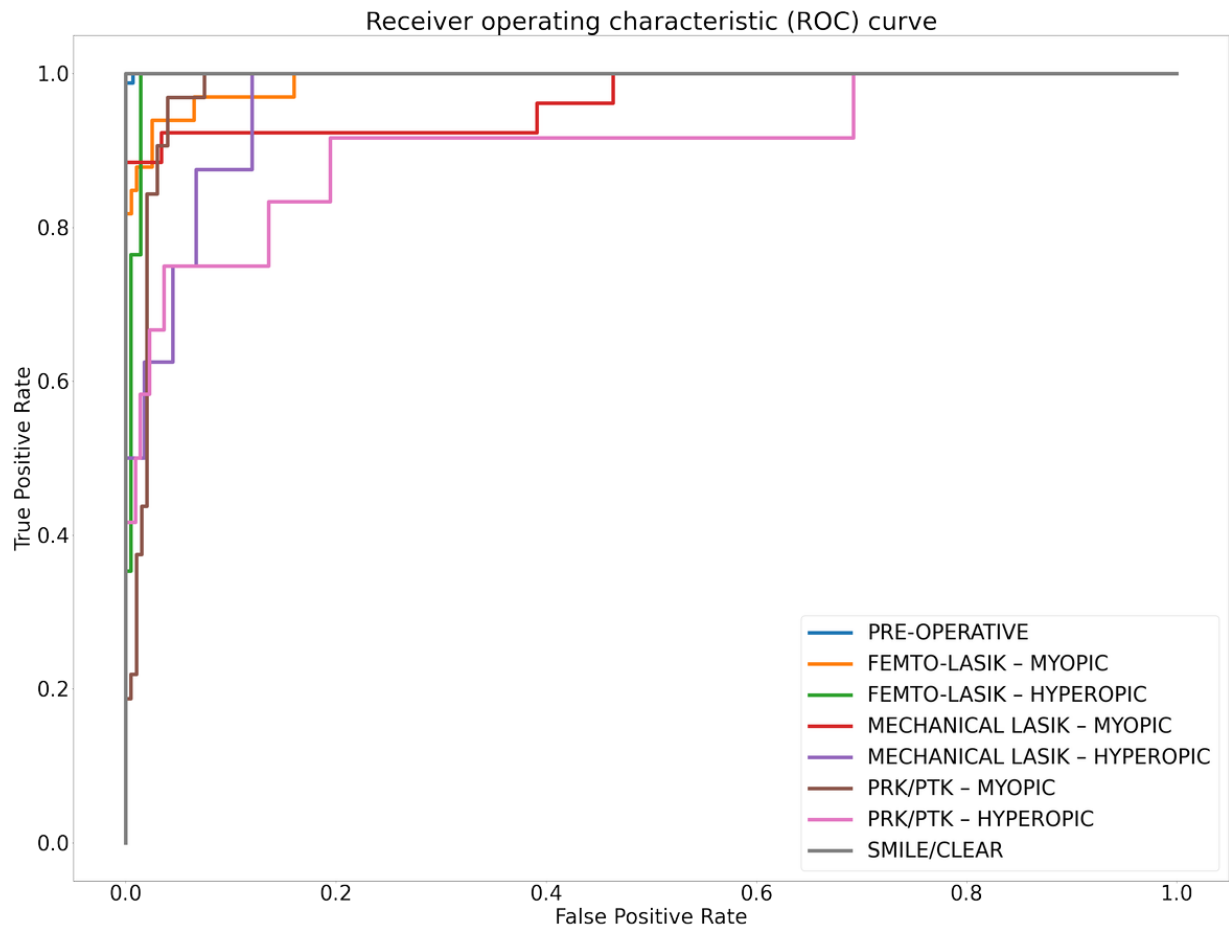

164

165 **Figure 2A:** 8-way ROC on the test set.



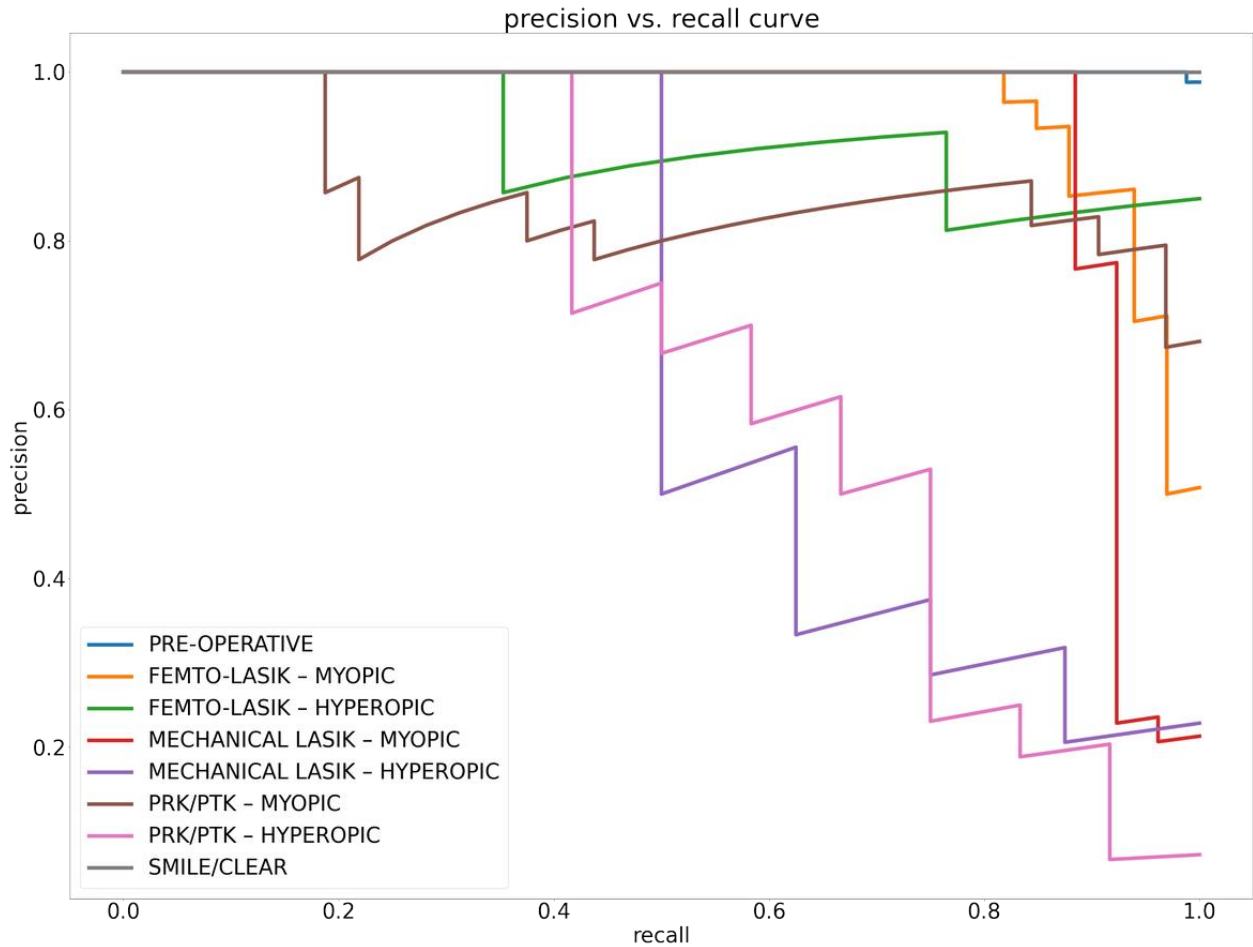

166

167 **Figure 2B:** 8-way PR curve on the test set.

168

## 169 DISCUSSION

170 This study has successfully developed a deep learning neural network that demonstrates  
171 proficiency in identifying a spectrum of keratorefractive laser surgeries from OCT B-scans. By  
172 leveraging transfer learning, the model adeptly managed dataset imbalances, showcasing a  
173 robust ability to classify between operative and non-operative eyes and to distinguish among  
174 specific types of surgeries.

175

176 In the 5-way prediction model, the network achieved an impressive accuracy of 96%. Yet,  
177 LASIK surgeries performed with mechanical keratomes experienced slightly higher

178 misclassification rates. This trend may reflect the dataset's composition, wherein mechanical  
179 LASIK procedures generally precede those done with femtosecond technology, resulting in  
180 older, well-healed surgical flaps that pose detection challenges for the model. This scenario  
181 highlights the complexity of detecting certain procedures, especially older ones, where the  
182 passage of time may diminish the distinctiveness of surgical signatures on OCT scans.

183

184 In the 8-way prediction, the network displayed capability in discerning the correction type  
185 within each surgical class, although with slightly diminished accuracy (90%), especially for the  
186 hyperopic variations of mechanical LASIK and PRK. These specific surgeries, being less  
187 common in our dataset, underscore the challenges posed by class imbalance and data  
188 scarcity. Attempts to mitigate this through transfer learning and adjusted loss function  
189 weighting were somewhat effective. The detection challenges are further exacerbated in  
190 hyperopic PRK cases due to the peripheral nature of the ablation and reduced OCT signal at  
191 the cornea's edges due to increased angle of incidence, complicating the identification of  
192 Bowman's layer changes. In such cases, a hyperopic PRK B-scan will be very similar to a normal  
193 patient. However, the model did not confuse both classes and the main errors arose in  
194 distinguishing myopic and hyperopic variations among each surgery.

195

196 An essential aspect of refining our model's accuracy involves understanding the subtle  
197 distinctions between different keratorefractive treatments, particularly when distinguishing  
198 between myopic and hyperopic corrections. This involves analyzing corneal epithelial  
199 thickness variations. Myopic ablations typically present with a compensatory thicker central  
200 epithelium (26), whereas hyperopic ablations exhibit thinner central epithelium due to  
201 induced corneal steepening (27,28). In PRK corrections, hyperopic treatments typically spare

202 Bowman's layer in the very center, while myopic PRK treatments ablate Bowman's layer along  
203 all of the optical zone.

204 To illustrate these distinctions further, Figure 3 presents OCT B-scans of various  
205 keratorefractive procedures, applanated along the anterior corneal curvature, highlighting  
206 the range of surgeries addressed in this study. Applanation enhances the visualization of  
207 variations in epithelial thickness and provides tomographic views of flap and cap interfaces.

208

209 **Figure 3:** *OCT B-scans depicting various keratorefractive procedures, applanated along the*  
210 *anterior corneal curvature. Arrows outline the flap/cap interfaces.*

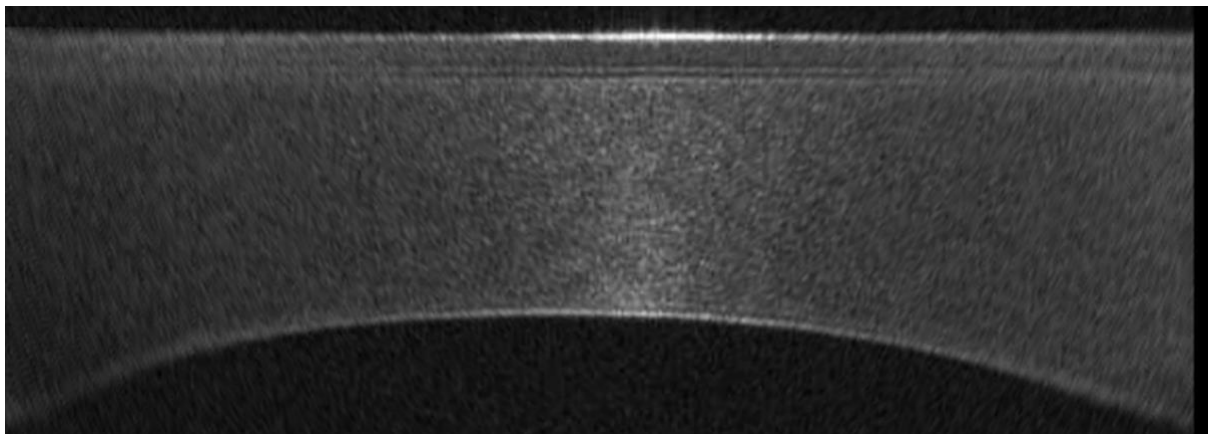

211

212 A. *Pre-operative scan demonstrates peripheral signal reduction due to an increased angle*  
213 *of incidence, leading to diminished visualization of the peripheral Bowman's bilaminar*  
214 *membrane.*

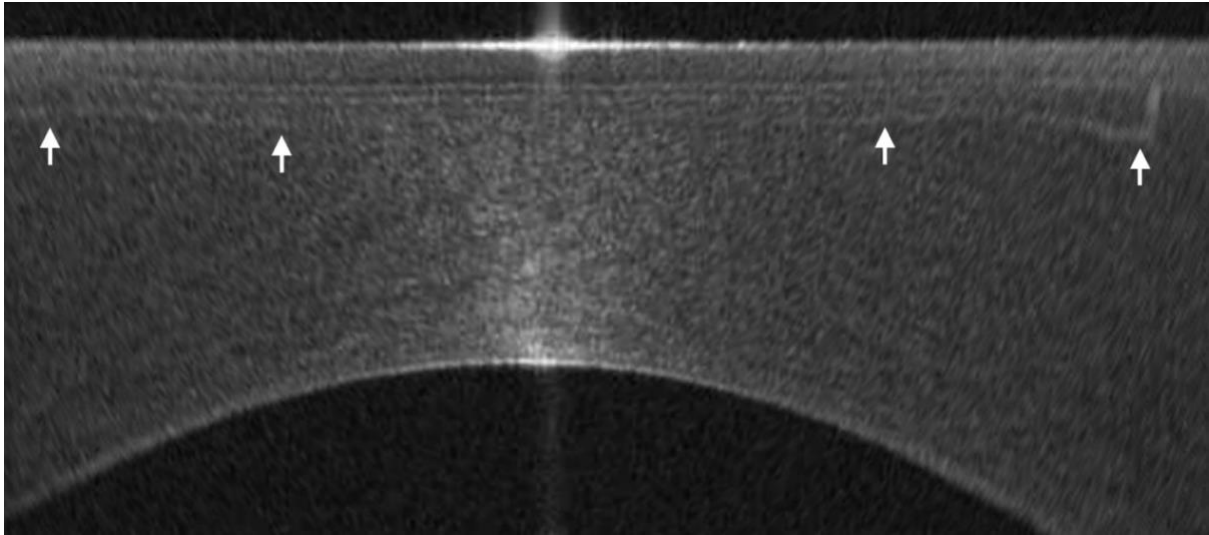

215

216 *B. Femto-LASIK with myopic correction showcases a centrally thickened epithelium, a*  
217 *characteristic result of myopic ablation.*

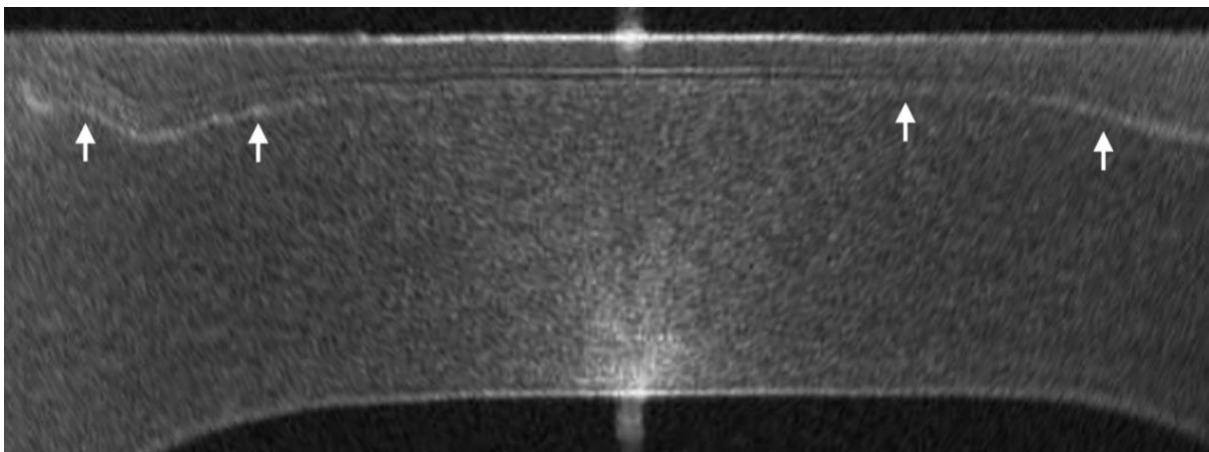

218

219 *C. Femto-LASIK with hyperopic correction reveals peripheral epithelial thickening,*  
220 *indicative of the corneal steepening associated with hyperopic ablation.*

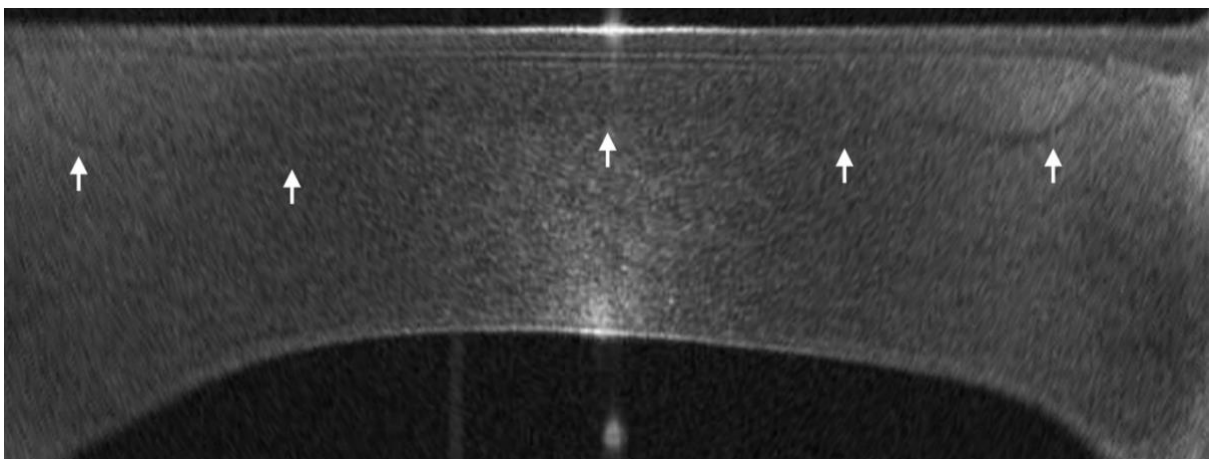

221

222 D. *Hyperopic LASIK using a mechanical keratome is characterized by a peripherally curved*  
223 *meniscal flap, distinguishing it from planar square-edged femtosecond-created flaps.*

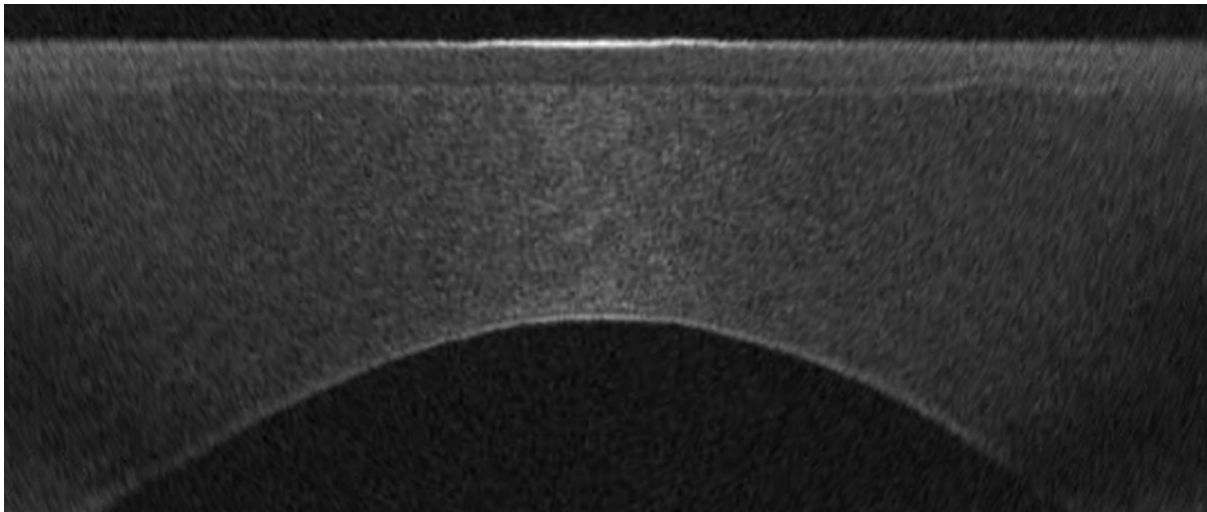

224  
225 E. *PRK with myopic ablation, characterized by the absence of Bowman's membrane.*

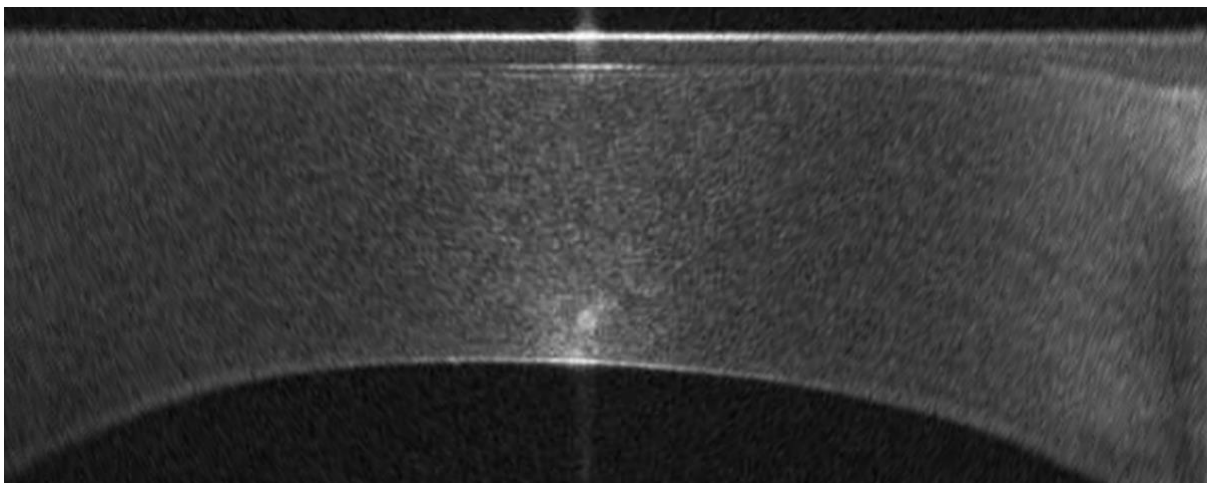

226  
227 F. *PRK with hyperopic ablation is notable for peripheral epithelial thickening, contrasting*  
228 *with myopic ablation. After hyperopic correction, the Bowman's bilaminar membrane*  
229 *typically remains intact centrally.*

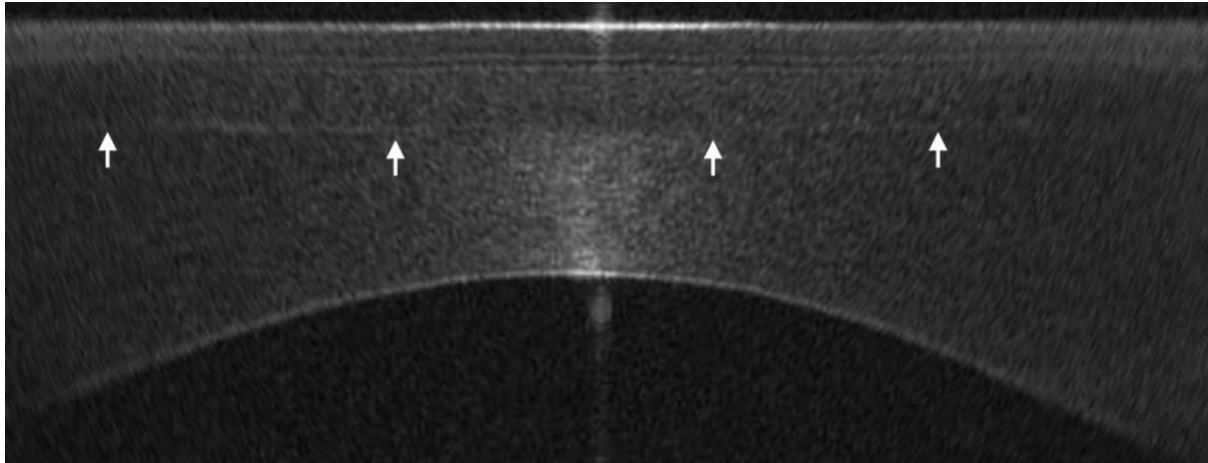

230

231 G. SMILE (KLEx) surgery. Unlike LASIK, the cap does not penetrate through the surface of  
232 the cornea in this section.

233

234 The sole reliance on B-scans is a notable limitation of this study. While radial B-scans yield a  
235 wealth of information, integrating tomographic parameters such as pachymetry, epithelial  
236 thickness, and corneal curvature could enrich the model's understanding of the cornea's  
237 refractive status. The majority voting mechanism used for classification does not consider  
238 spatial dependencies inherent in these scans, which could be addressed by a network  
239 architecture that integrates all B-scans collectively.

240 Enhancements to the data preprocessing approach, such as applanating the cornea, could  
241 sharpen our focus on variations in central and paracentral epithelial thickness—key indicators  
242 for distinguishing between myopic and hyperopic corrections (27,28). Furthermore, exploring  
243 the estimation of the extent of ablation performed on the cornea as well as the presence of  
244 a mixed astigmatism correction could serve as valuable features for future investigations.  
245 Furthermore, evolving our model to detect multiple sequential surgeries, including a primary  
246 LASIK followed by a PRK touch-up, or even enhancements via flap lift, also emerges as an

247 important next step. Such developments would require a meticulously labeled dataset,  
248 encompassing cases with these specific surgical histories.

249

250 Despite the outlined limitations, the model demonstrates significant promise, with minimal  
251 errors observed in its classifications. Future work will aim to automate the segmentation of  
252 LASIK flaps and lenticule cap interfaces, enhancing the utility of this model in post-operative  
253 assessments.

254

255 In conclusion, this study presents a significant advancement in the application of deep  
256 learning in refractive surgery, specifically in the identification and classification of  
257 keratorefractive laser surgeries through OCT. Our model demonstrates robust performance  
258 and offers a promising foundation for further refinement and application. By addressing the  
259 outlined limitations and exploring the proposed enhancements, future iterations of this  
260 model have the potential to substantially improve post-operative assessments and contribute  
261 to more personalized patient care strategies.

## 262 REFERENCES

- 263 1. Ramos JLB, Li Y, Huang D. Clinical and research applications of anterior segment optical  
264 coherence tomography - a review. *Clin Experiment Ophthalmol*. 2009 Jan;37(1):81–9.
- 265 2. Ang M, Baskaran M, Werkmeister RM, Chua J, Schmidl D, Aranha Dos Santos V, et al.  
266 Anterior segment optical coherence tomography. *Prog Retin Eye Res*. 2018 Sep;66:132–  
267 56.
- 268 3. Assaf JF, Reinstein DZ, Zakka C, Arbelaez JG, Boufadel P, Choufani M, et al. Deep Learning-  
269 Based Estimation of Implantable Collamer Lens Vault Using Optical Coherence  
270 Tomography. *Am J Ophthalmol*. 2023 Sep;253:29–36.
- 271 4. Assaf JF, Yazbeck H, Reinstein DZ, Archer T, Arbelaez JG, Arbelaez MC, et al. Enhancing  
272 the Automated Detection of Implantable Collamer Lens Vault using Generative  
273 Adversarial Networks and Synthetic Data on Optical Coherence Tomography. *J Refract  
274 Surg*. 2024;(forthcoming).
- 275 5. Zéboulon P, Panthier C, Rouger H, Bijon J, Ghazal W, Gatinel D. Development and  
276 validation of a pixel wise deep learning model to detect cataract on swept-source optical  
277 coherence tomography images. *J Optom*. 2022;15 Suppl 1(Suppl 1):S43–9.
- 278 6. Zéboulon P, Ghazal W, Gatinel D. Corneal Edema Visualization With Optical Coherence  
279 Tomography Using Deep Learning: Proof of Concept. *Cornea*. 2021 Oct 1;40(10):1267–75.
- 280 7. Chase C, Elsayy A, Eleiwa T, Ozcan E, Tolba M, Abou Shousha M. Comparison of  
281 Autonomous AS-OCT Deep Learning Algorithm and Clinical Dry Eye Tests in Diagnosis of  
282 Dry Eye Disease. *Clin Ophthalmol Auckl NZ*. 2021;15:4281–9.
- 283 8. Assaf JF, Mrad AA, Reinstein DZ, Amescua G, Zakka C, Archer T, et al. Creating Realistic  
284 Anterior Segment Optical Coherence Tomography Images using Generative Adversarial  
285 Networks [Internet]. arXiv; 2023 [cited 2024 Feb 27]. Available from:  
286 <http://arxiv.org/abs/2306.14058>
- 287 9. Masket S, Masket SE. Simple regression formula for intraocular lens power adjustment in  
288 eyes requiring cataract surgery after excimer laser photoablation. *J Cataract Refract Surg*.  
289 2006 Mar;32(3):430–4.
- 290 10. Vinciguerra R, Ambrósio R, Elsheikh A, Hafezi F, Yong Kang DS, Kermani O, et al.  
291 Detection of postlaser vision correction ectasia with a new combined biomechanical  
292 index. *J Cataract Refract Surg*. 2021 Oct 1;47(10):1314–8.
- 293 11. Reinstein DZ, Archer TJ, Gobbe M. LASIK flap thickness profile and reproducibility of  
294 the standard vs zero compression Hansatome microkeratomes: three-dimensional display  
295 with Artemis VHF digital ultrasound. *J Refract Surg Thorofare NJ* 1995. 2011  
296 Jun;27(6):417–26.
- 297 12. Reinstein DZ, Sutton HFS, Srivannaboon S, Silverman RH, Archer TJ, Coleman DJ.  
298 Evaluating microkeratome efficacy by 3D corneal lamellar flap thickness accuracy and



- 299 reproducibility using Artemis VHF digital ultrasound arc-scanning. J Refract Surg  
300 Thorofare NJ 1995. 2006 May;22(5):431–40.
- 301 13. Reinstein DZ, Archer TJ, Gobbe M. Accuracy and reproducibility of cap thickness in  
302 small incision lenticule extraction. J Refract Surg Thorofare NJ 1995. 2013  
303 Dec;29(12):810–5.
- 304 14. Reinstein DZ, Archer TJ, Gobbe M, Johnson N. Accuracy and reproducibility of  
305 artemis central flap thickness and visual outcomes of LASIK with the Carl Zeiss Meditec  
306 VisuMax femtosecond laser and MEL 80 excimer laser platforms. J Refract Surg Thorofare  
307 NJ 1995. 2010 Feb;26(2):107–19.
- 308 15. Xia LK, Yu J, Chai GR, Wang D, Li Y. Comparison of the femtosecond laser and  
309 mechanical microkeratome for flap cutting in LASIK. Int J Ophthalmol. 2015 Aug  
310 18;8(4):784–90.
- 311 16. Kahuam-López N, Navas A, Castillo-Salgado C, Graue-Hernandez EO, Jimenez-Corona  
312 A, Ibarra A. Femtosecond laser versus mechanical microkeratome use for laser-assisted  
313 in-situ keratomileusis (LASIK). Cochrane Database Syst Rev. 2018 Feb  
314 8;2018(2):CD012946.
- 315 17. Titiyal JS, Kaur M, Shaikh F, Gagrani M, Brar AS, Rathi A. Small incision lenticule  
316 extraction (SMILE) techniques: patient selection and perspectives. Clin Ophthalmol Auckl  
317 NZ. 2018 Sep 5;12:1685–99.
- 318 18. Moilanen JAO, Vesaluoma MH, Müller LJ, Tervo TMT. Long-Term Corneal  
319 Morphology after PRK by In Vivo Confocal Microscopy. Invest Ophthalmol Vis Sci. 2003  
320 Mar 1;44(3):1064–9.
- 321 19. Tampu IE, Eklund A, Haj-Hosseini N. Inflation of test accuracy due to data leakage in  
322 deep learning-based classification of OCT images. Sci Data. 2022 Sep 22;9(1):580.
- 323 20. He K, Zhang X, Ren S, Sun J. Deep Residual Learning for Image Recognition. In: 2016  
324 IEEE Conference on Computer Vision and Pattern Recognition (CVPR) [Internet]. 2016  
325 [cited 2024 Feb 27]. p. 770–8. Available from:  
326 <https://ieeexplore.ieee.org/document/7780459>
- 327 21. Russakovsky O, Deng J, Su H, Krause J, Satheesh S, Ma S, et al. ImageNet Large Scale  
328 Visual Recognition Challenge [Internet]. arXiv; 2015 [cited 2024 Feb 27]. Available from:  
329 <http://arxiv.org/abs/1409.0575>
- 330 22. Smith LN. Cyclical Learning Rates for Training Neural Networks. In: 2017 IEEE Winter  
331 Conference on Applications of Computer Vision (WACV) [Internet]. 2017 [cited 2024 Feb  
332 27]. p. 464–72. Available from: <https://ieeexplore.ieee.org/document/7926641>
- 333 23. Howard J, Ruder S. Universal Language Model Fine-tuning for Text Classification  
334 [Internet]. arXiv; 2018 [cited 2024 Feb 27]. Available from:  
335 <http://arxiv.org/abs/1801.06146>

- 336 24. Smith LN. A disciplined approach to neural network hyper-parameters: Part 1 --  
337 learning rate, batch size, momentum, and weight decay [Internet]. arXiv; 2018 [cited  
338 2024 Feb 27]. Available from: <http://arxiv.org/abs/1803.09820>
- 339 25. Paszke A, Gross S, Massa F, Lerer A, Bradbury J, Chanan G, et al. PyTorch: An  
340 Imperative Style, High-Performance Deep Learning Library [Internet]. arXiv; 2019 [cited  
341 2024 Feb 27]. Available from: <http://arxiv.org/abs/1912.01703>
- 342 26. Reinstein DZ, Archer TJ, Gobbe M. Change in epithelial thickness profile 24 hours and  
343 longitudinally for 1 year after myopic LASIK: three-dimensional display with Artemis very  
344 high-frequency digital ultrasound. *J Refract Surg Thorofare NJ* 1995. 2012 Mar;*28*(3):195–  
345 201.
- 346 27. Reinstein DZ, Srivannaboon S, Gobbe M, Archer TJ, Silverman RH, Sutton H, et al.  
347 Epithelial Thickness Profile Changes Induced by Myopic LASIK as Measured by Artemis  
348 Very High-frequency Digital Ultrasound. *J Refract Surg*. 2009 May;*25*(5):444–50.
- 349 28. Reinstein DZ, Archer TJ, Gobbe M, Silverman RH, Coleman DJ. Epithelial Thickness  
350 After Hyperopic LASIK: Three-Dimensional Display with Artemis Very High-Frequency  
351 Digital Ultrasound. *J Refract Surg*. 2010 Aug;*26*(8):555–64.
- 352
